# Supplementary material for: Superplasticity in an organic crystal
Source: PubMed Central journal article supplement (PMC6162311; doi:10.1038/s41467-018-06431-7), 2018-09-28
Supplement: 41467_2018_6431_MOESM3_ESM.pdf [file 41467_2018_6431_MOESM3_ESM.pdf]

## **Description of Additional Supplementary Files**

**Supplementary Movie 1:** Superplastic deformation of a crystal of 1 up to ca. 500% strain.

**Supplementary Movie 2:** Twinning deformation of a crystal of 1 in conjunction with multi-layer slipping.

**Supplementary Movie 3:** Superelastic behavior of a crystal of 1.

**Supplementary Movie 4:** Superplastic deformation of a crystal of 1 of which strain rate quickly shifted from  $1.0 \text{ s}^{-1}$  to  $5.0 \text{ s}^{-1}$ .

**Supplementary Movie 5:** Superplastic deformation of a crystal of 1 of which strain rate quickly shifted from  $2.0 \text{ s}^{-1}$  to  $20 \text{ s}^{-1}$ .

**Supplementary Movie 6:** Superelastic behavior of a crystal of 1 during a stress test.

**Supplementary Movie 7:** Superplastic deformation of a crystal of 1 up to ca. 400% strain.

**Supplementary Movie 8:** Superelastic behavior of a crystal of 1 after superplastic deformation up to ca. 400% strain.

**Supplementary Movie 9:** Coupling of superplasticity and superelasticity in a crystal of 1.
